# Supplementary material
Source: publisher site journal article supplement (https://www.dovepress.com/article/218112)
Supplement: Supplementary file 1 [file get_supplementary_file.php]

Appendix 1. Examples of interview questions

| 1. **What is your idea about working in ICU?** |
| --- |
| 1. **How is your experience about working in ICU?** |
| 1. **How would you describe your experience working in ICU?** |
| 1. **Would you please explain your working day?** |
| 1. **What is your idea about job satisfaction?** |
| 1. **Do you have job satisfaction? In which aspect do you have job satisfaction and in which aspect you do not?** |
| 1. **Which factors affect it?** |
